# Supplementary material for: Coil–rod–coil triblock copolymers synthesized by macromolecular clicking and their compatibilizer effects in all-polymer solar cells
Source: Royal Society of Chemistry journal article supplement (doi:10.1039/d1tc04948h), 2021-11-25
Supplement: d1tc04948h1.pdf [file d1tc04948h1.pdf]

## Supplementary Information

### **Coil-rod-coil triblock copolymers synthesized by macromolecular clicking and their compatibilizer effects in all-polymer solar cells**

Sultan Otep,<sup>a</sup> Yu-Cheng Tseng,<sup>b</sup> Naomasa Yomogita,<sup>a</sup> Jia-Fu Chang,<sup>b</sup> Chu-Chen  
Chueh<sup>b,\*</sup> and Tsuyoshi Michinobu<sup>a,\*</sup>

---

<sup>a</sup> *Department of Materials Science and Engineering, Tokyo  
Institute of Technology, 2-12-1 Ookayama, Meguro-ku, Tokyo  
152-8552, Japan. E-mail: michinobu.t.aa@m.titech.ac.jp*

<sup>b</sup> *Department of Chemical Engineering and Advanced Research  
Center for Green Materials Science and Technology, National  
Taiwan University, Taipei 10617, Taiwan. E-mail:  
cchueh@ntu.edu.tw*

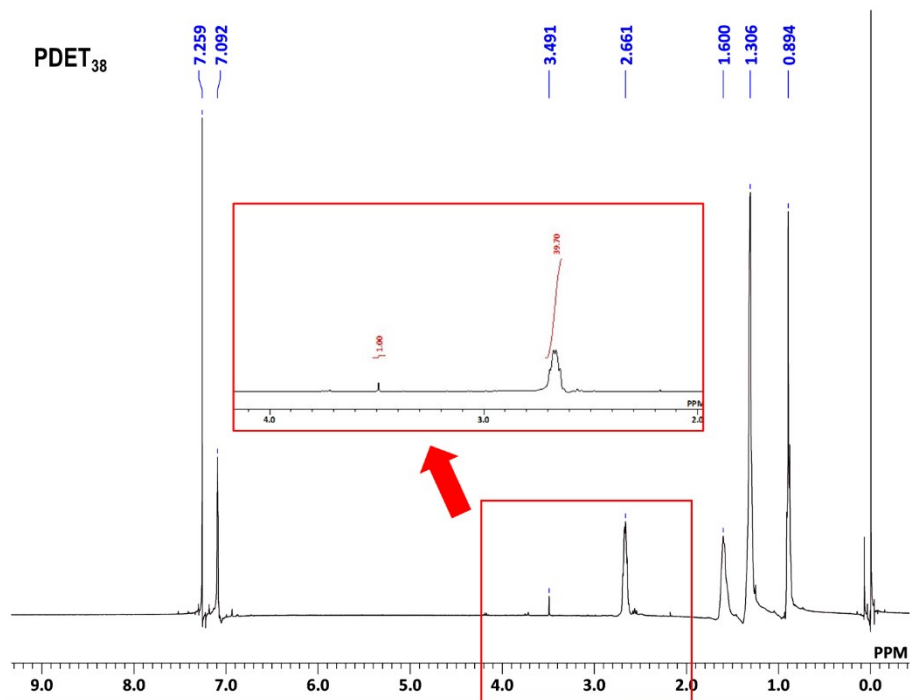

**Figure S1.** <sup>1</sup>H NMR spectrum of **PDET<sub>38</sub>** in CDCl<sub>3</sub>.

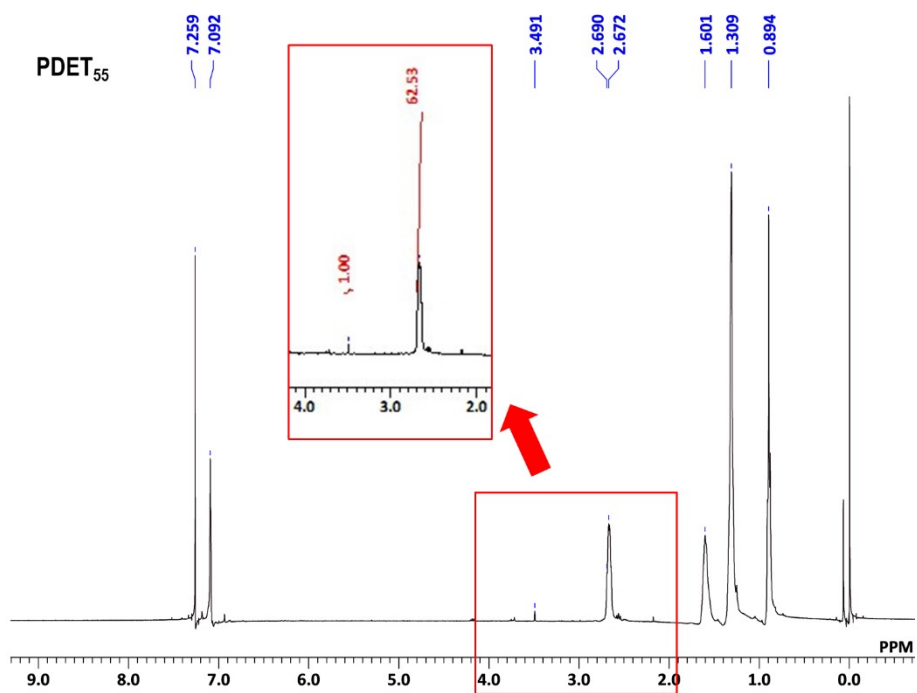

**Figure S2.** <sup>1</sup>H NMR spectrum of **PDET<sub>55</sub>** in CDCl<sub>3</sub>.

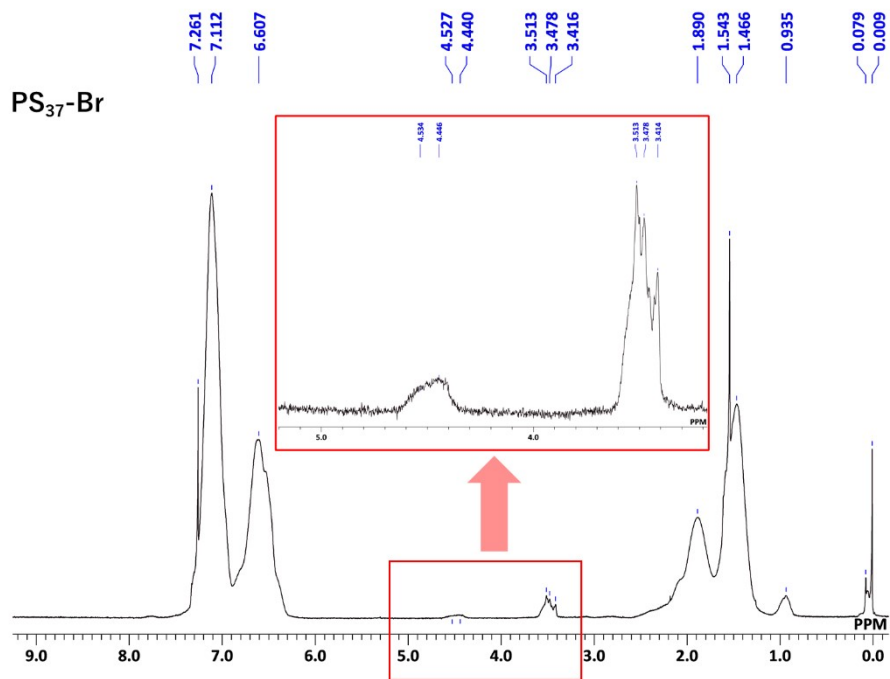

**Figure S3.** <sup>1</sup>H NMR spectrum of PS<sub>37</sub>-Br in CDCl<sub>3</sub>.

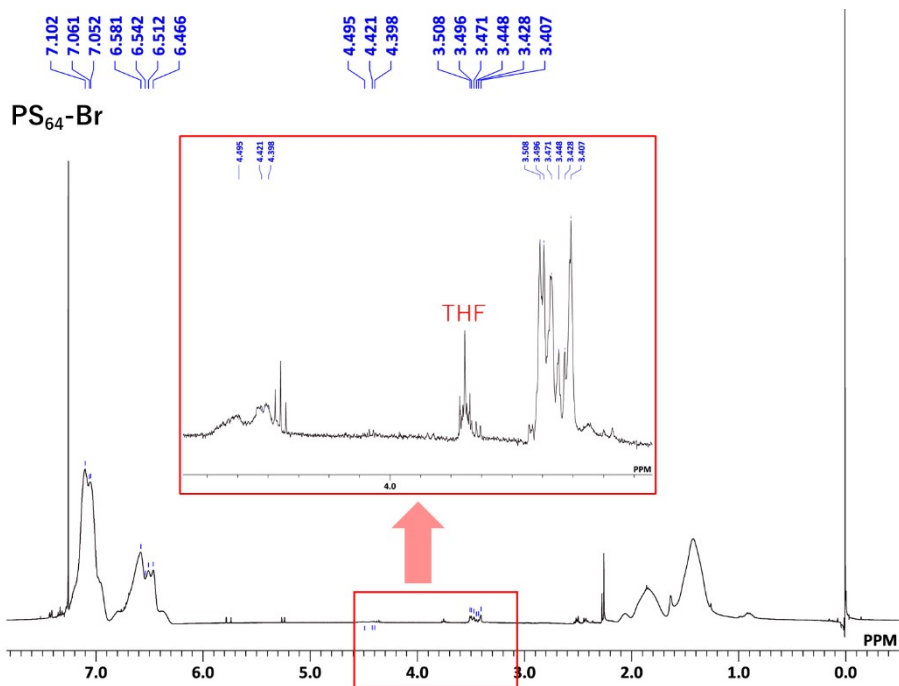

**Figure S4.** <sup>1</sup>H NMR spectrum of PS<sub>64</sub>-Br in CDCl<sub>3</sub>.

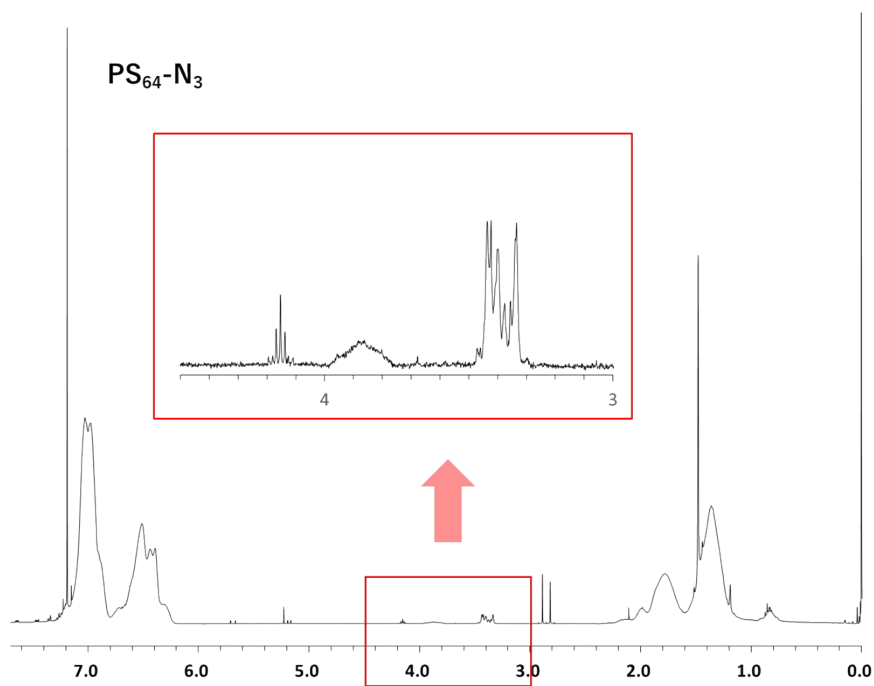

**Figure S5.**  $^1\text{H}$  NMR spectrum of  $\text{PS}_{64}\text{-N}_3$  in  $\text{CDCl}_3$ .

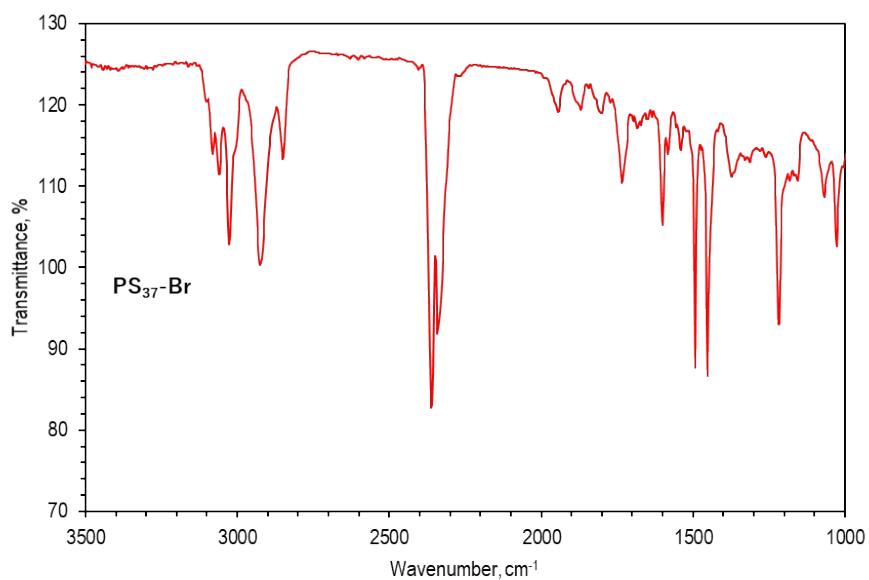

**Figure S6.** FTIR spectrum of  $\text{PS}_{37}\text{-Br}$ .

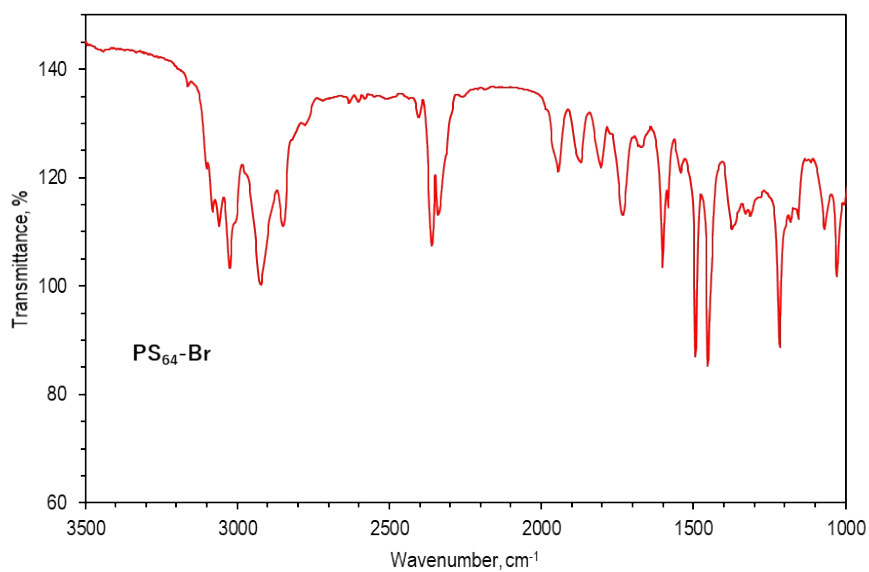

**Figure S7.** FTIR spectrum of PS<sub>64</sub>-Br.

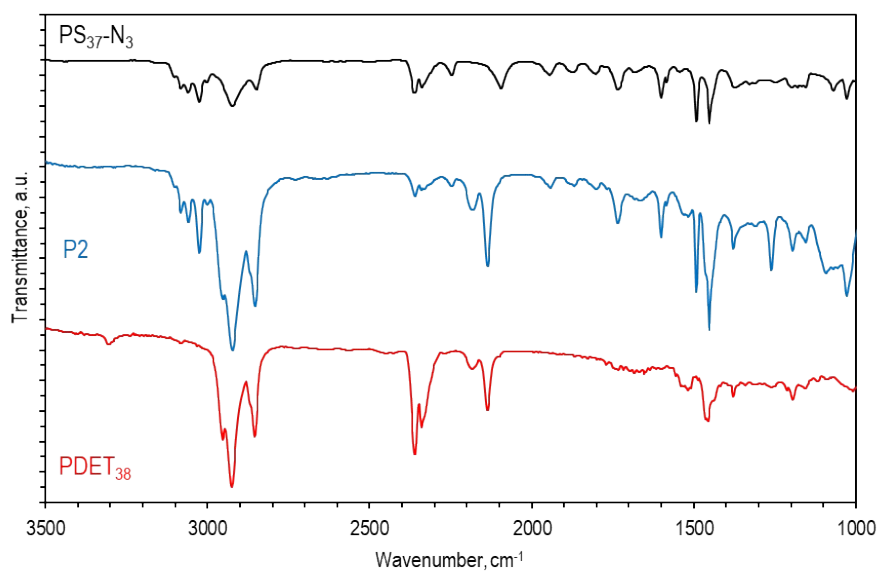

**Figure S8.** Comparison of FTIR spectra of PS<sub>37</sub>-N<sub>3</sub>, PDET<sub>38</sub> and P2.

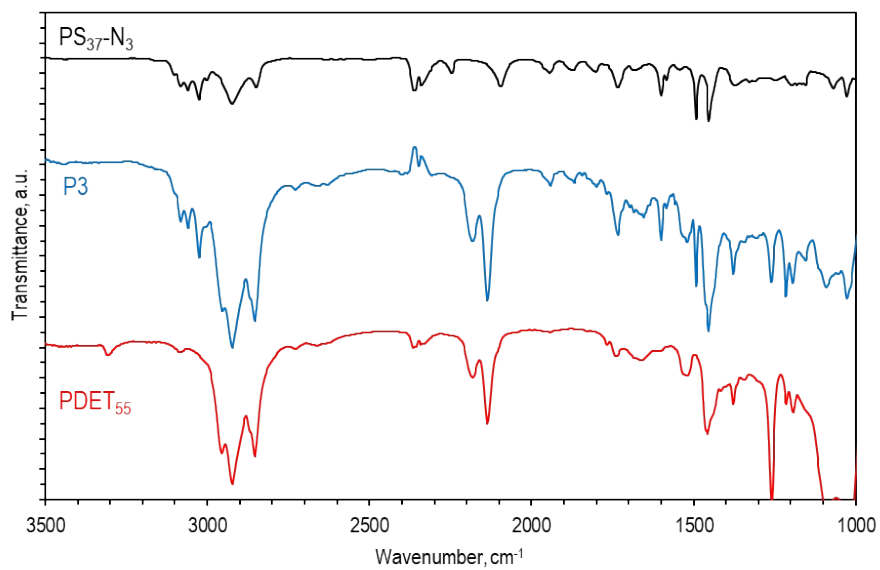

**Figure S9.** Comparison of FTIR spectra of PS<sub>37</sub>-N<sub>3</sub>, PDET<sub>55</sub> and P3.

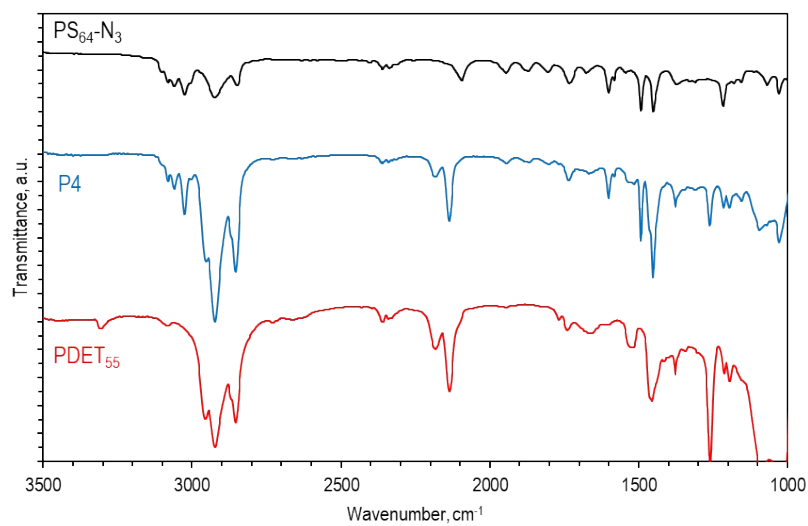

**Figure S10.** Comparison of FTIR spectra of PS<sub>64</sub>-N<sub>3</sub>, PDET<sub>55</sub> and P4.

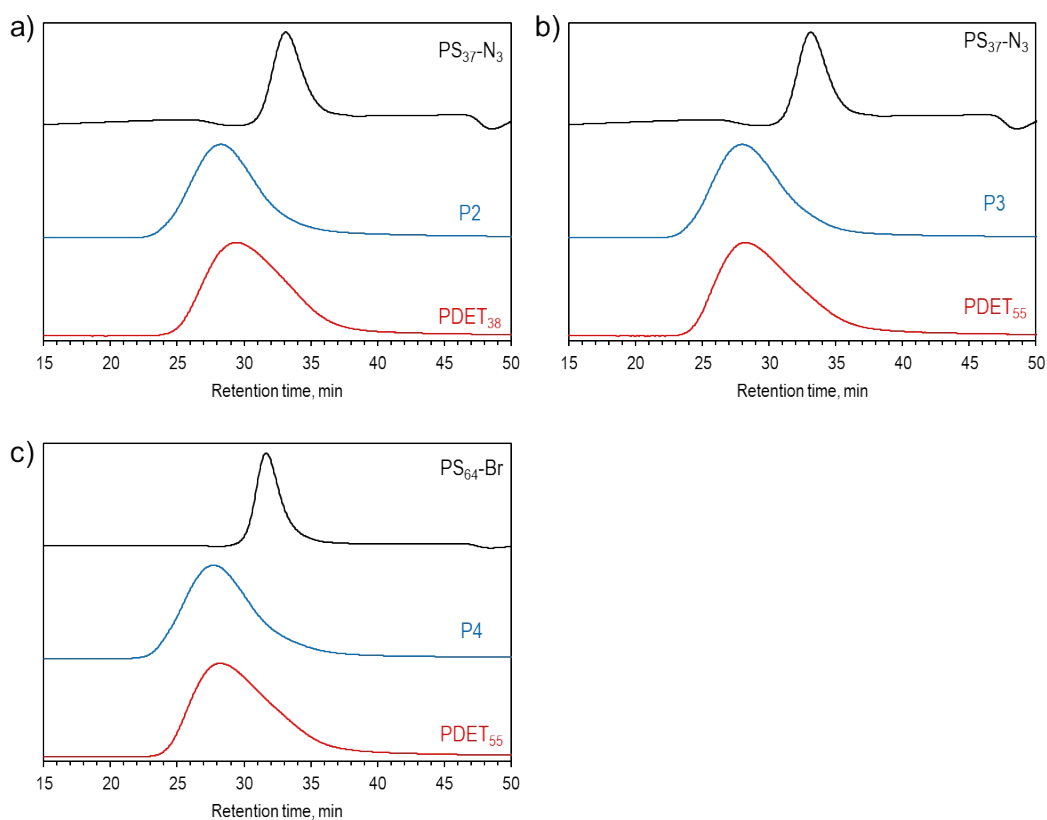

**Figure S11.** GPC curves of a) **P2**, PS<sub>37</sub>-N<sub>3</sub> and **PDET<sub>38</sub>**, b) **P3**, PS<sub>37</sub>-N<sub>3</sub> and **PDET<sub>55</sub>**, and c) **P4**, PS<sub>64</sub>-Br and **PDET<sub>55</sub>**.

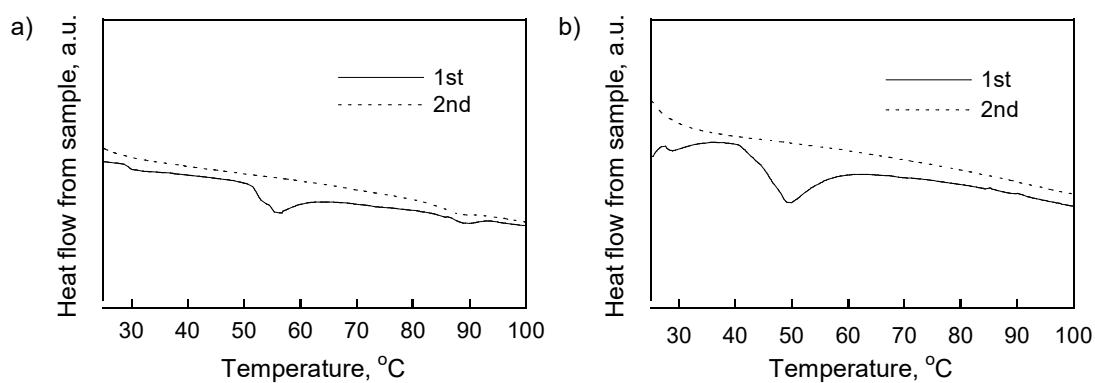

**Figure S12.** The 1st and 2nd heating scans of DSC curves of a) PS<sub>37</sub>-N<sub>3</sub> and b) **P1**.

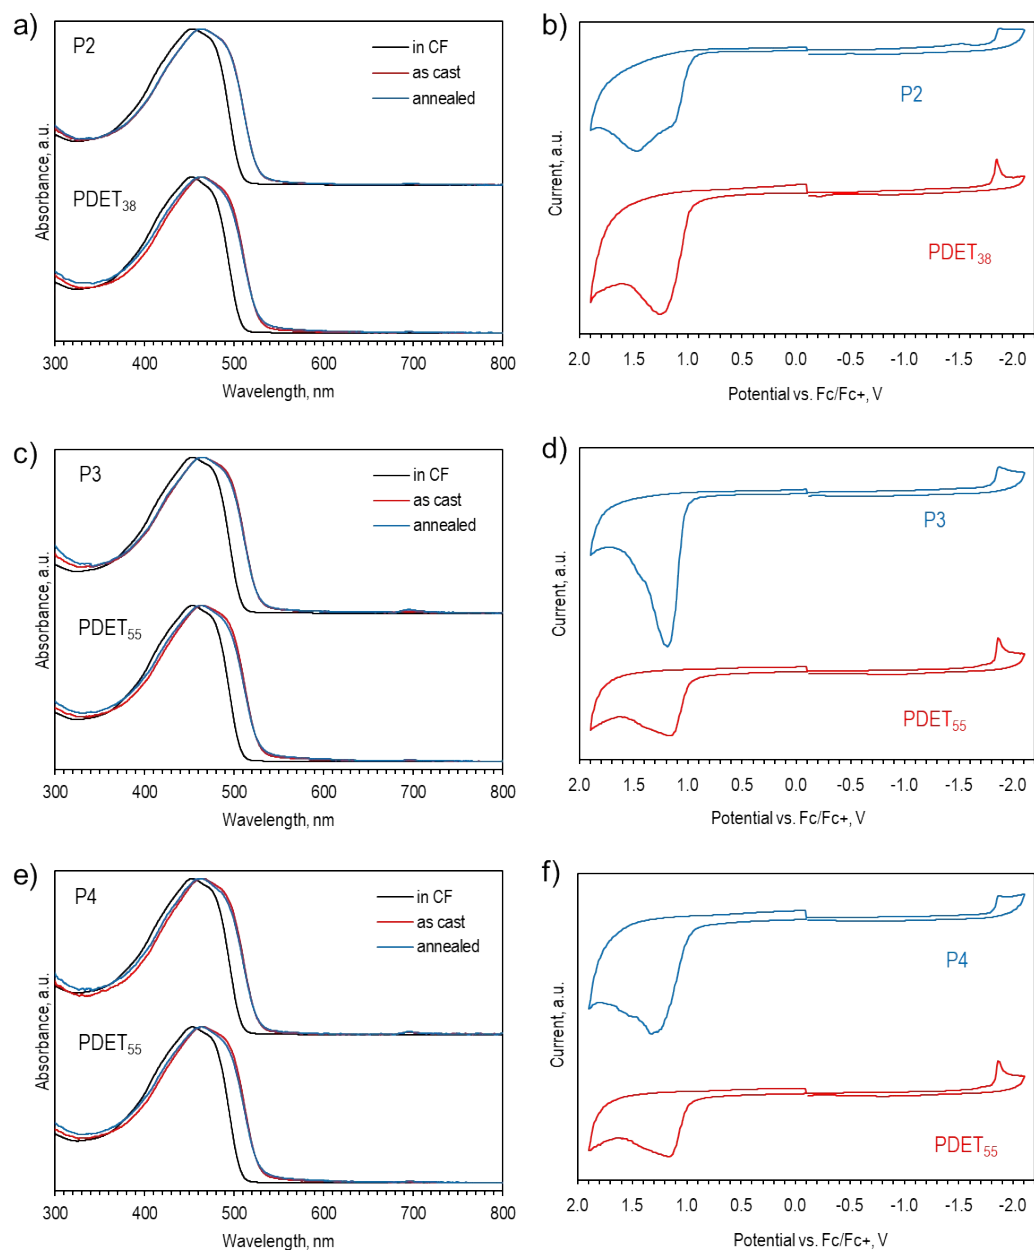

**Figure S13.** Comparison of UV-vis absorption spectra and CV curves of the polymers.

UV-vis absorption spectra in chloroform (CF), as-cast film and annealed film of a) **P2** and **PDET<sub>38</sub>**, c) **P3** and **PDET<sub>55</sub>**, and e) **P4** and **PDET<sub>55</sub>**. CV curves of b) **P2** and **PDET<sub>38</sub>**, d) **P3** and **PDET<sub>55</sub>**, and f) **P4** and **PDET<sub>55</sub>**, measured in CH<sub>3</sub>CN with 0.1 M (nC<sub>4</sub>H<sub>9</sub>)<sub>4</sub>NPF<sub>6</sub>.



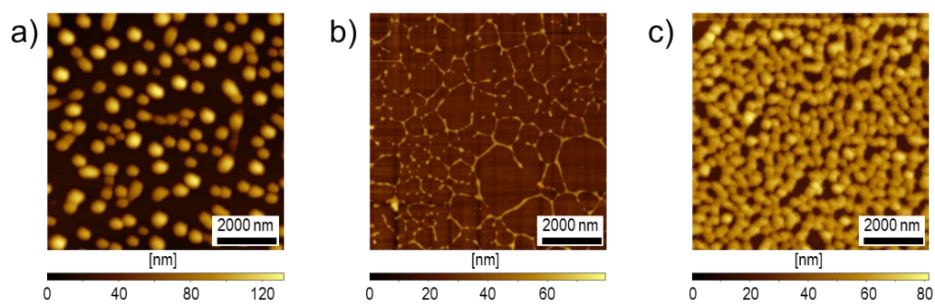

**Figure S14.** Larger scan area images of the annealed films of a) **P2**, b) **P3** and c) **P4**.

Films were annealed on a hot plate at 120 °C for 30 min.

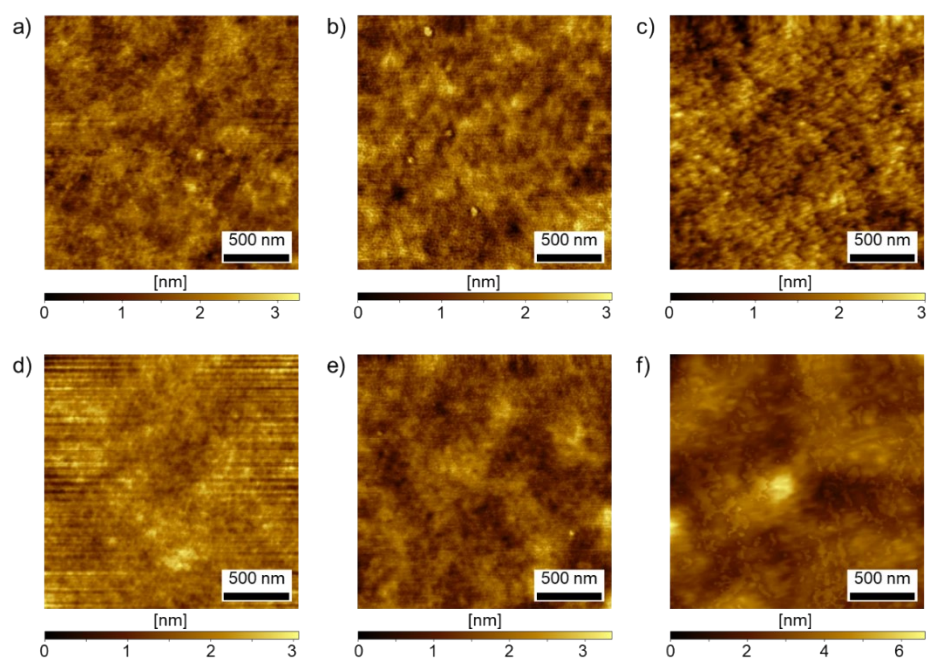

**Figure S15.** AFM topography images of the films of **PDET<sub>29</sub>** a) as-cast, b) annealed at 100 °C and c) annealed at 200 °C. AFM topography images of the films of **P1** d) as-cast, e) annealed at 100 °C and f) annealed at 200 °C.

**Table S1.** Properties of the synthesized homopolymers.

| Polymer <sup>a)</sup>     | GPC <sup>b)</sup>                |           |    | <sup>1</sup> H NMR <sup>c)</sup> |    | Functionality, % |
|---------------------------|----------------------------------|-----------|----|----------------------------------|----|------------------|
|                           | $M_n$<br>(kg mol <sup>-1</sup> ) | $\bar{D}$ | DP | $M_n$<br>(kg mol <sup>-1</sup> ) | DP |                  |
| <b>PDET<sub>29</sub></b>  | 6.26                             | 3.06      | 29 | 6.12                             | 29 |                  |
| <b>PDET<sub>38</sub></b>  | 8.14                             | 2.82      | 38 | 8.50                             | 40 |                  |
| <b>PDET<sub>55</sub></b>  | 11.77                            | 2.83      | 55 | 13.38                            | 62 |                  |
| <b>PS<sub>37</sub>-Br</b> | 3.97                             | 1.05      | 37 | 3.79                             | 35 | 90 <sup>d)</sup> |
| <b>PS<sub>64</sub>-Br</b> | 6.85                             | 1.05      | 64 | 6.61                             | 62 | 91 <sup>d)</sup> |

<sup>a)</sup> Labeled according to the degree of polymerization (DP) determined by GPC: **PDET<sub>DP</sub>** and **PS<sub>DP</sub>-Br**. <sup>b)</sup> Measured with *o*-dichlorobenzene at 40 °C and molecular weights estimated by comparing to polystyrene standards. <sup>c)</sup> For **PDET**, estimated from the ratio of the <sup>1</sup>H NMR peak areas of the terminal alkyne and the repeat DET units. For **PS-Br**, estimated from the ratio of the <sup>1</sup>H NMR peak areas of the terminal methoxy group and repeat benzene rings. <sup>d)</sup> Azido-functionality calculated from the <sup>1</sup>H NMR peak areas of the methoxy group and the  $\alpha$ -hydrogen on the other end of the polymer chain. See Figure 1 for the details of the evaluation of the <sup>1</sup>H NMR results.

**Table S2.** Detailed energy loss of the fabricated all-PSCs.

|                       | $E_{gap}$<br>(eV) | $V_{oc}$<br>(eV) |  | $E_{loss}$<br>(eV) | $f$<br>(eV <sup>2</sup> ) | $\lambda$<br>(eV) | $E_{CT}$<br>(eV) | $\Delta E_1$<br>(eV) | $\Delta E_2$<br>(eV) | $\Delta E_3$<br>(eV) |
|-----------------------|-------------------|------------------|--|--------------------|---------------------------|-------------------|------------------|----------------------|----------------------|----------------------|
| <b>Control</b>        | 1.481             | 0.878            |  | 0.603              | 0.0204                    | 0.279             | 1.42             | 0.267                | 0.061                | 0.276                |
| <b>1 wt%<br/>P1</b>   | 1.487             | 0.885            |  | 0.602              | 0.0154                    | 0.212             | 1.44             | 0.262                | 0.047                | 0.293                |
| <b>1 wt%<br/>PDET</b> | 1.516             | 0.862            |  | 0.654              | 0.0204                    | 0.141             | 1.46             | 0.275                | 0.056                | 0.323                |
